# Supplementary material for: Artificial Intelligence-Assisted Image Analysis of Acetaminophen-Induced Acute Hepatic Injury in Sprague-Dawley Rats
Source: MDPI journal article supplement (doi:10.3390/diagnostics12061478), 2022-06-16

**Supplementary material Table S1. Number of cropped tile images used for the model training, validation, and testing.** Numbers in brackets indicate data augmentation using a combination of image-augmenting techniques, such as reverse, rotation, and brightness.

**Supplementary material Figure S1. Training loss during model establishment.** Bbox (A), class (B), mask (C), and total (D) losses during training.

**Supplementary material Figure S2. Discrepancy in inflammation detection between annotation and algorithm prediction.** Yellow arrow indicates a region annotated as inflammation but incorrectly recognized as infiltration by the algorithm. Portal triad (blue), inflammation (yellow), infiltration (green), and necrosis (white) are shown as different colors.

**Supplementary material Figure S3. Comparison of portal triad detection between 3 class model and 4 class model.** In 3 class model, annotated portal triad was confused with inflammation or infiltration (upper panel). However, after training of portal triad, called 4 class model, improved the accuracy of portal triad recognition and confusion with other lesions. Portal triad (blue), inflammation (yellow), infiltration (green), and necrosis (white) are shown as different colors.

**Supplementary material Figure S4. Discrepancy in connective tissue detection between annotation and algorithm prediction.** Blue arrow indicates a region annotated as connective tissue but incorrectly recognized as necrosis by the algorithm. Portal triad (blue), inflammation (yellow), infiltration (green), and necrosis (white) are shown as different colors.

**Supplementary material Table S1.**

|                   | <b>Portal triad</b> | <b>Necrosis</b> | <b>Inflammation</b> | <b>Infiltration</b> | <b>Total</b>   |
|-------------------|---------------------|-----------------|---------------------|---------------------|----------------|
| <b>Training</b>   | 1,397 (11,176)      | 1,470 (11,760)  | 1,462 (11,696)      | 1,460 (11,680)      | 5,789 (46,312) |
| <b>Validation</b> | 399                 | 420             | 421                 | 419                 | 1,659          |
| <b>Test</b>       | 204                 | 210             | 219                 | 210                 | 843            |
| <b>Total</b>      | 11,779              | 12,390          | 12,336              | 12,309              | 48,814         |

Supplementary material Figure S1.

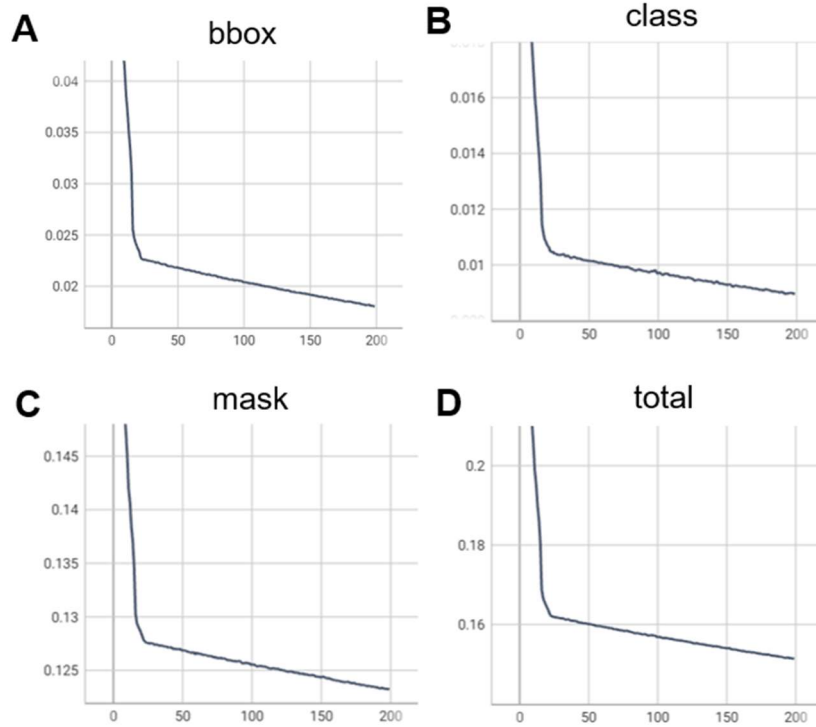

**Supplementary material Figure S2.**

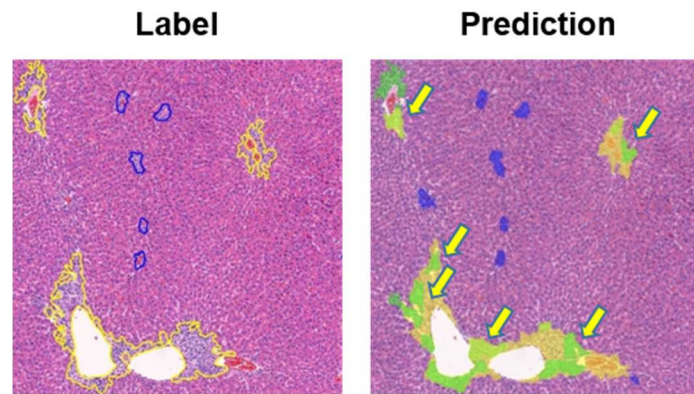

Supplementary material Figure S3.

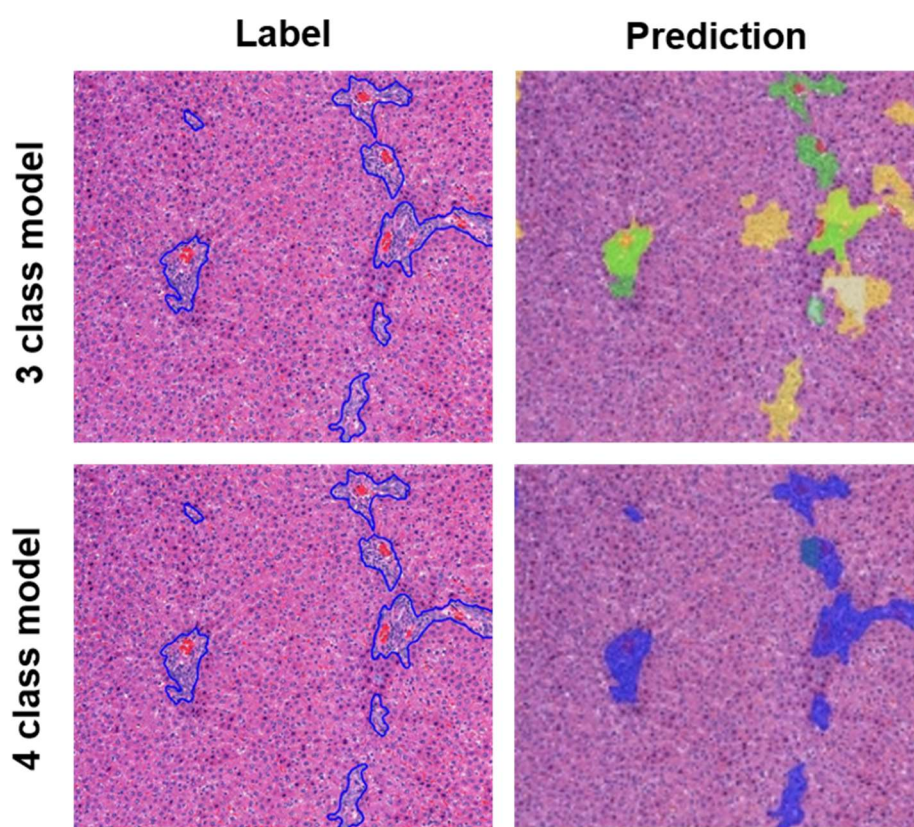

Supplementary material Figure S4.

Annotation

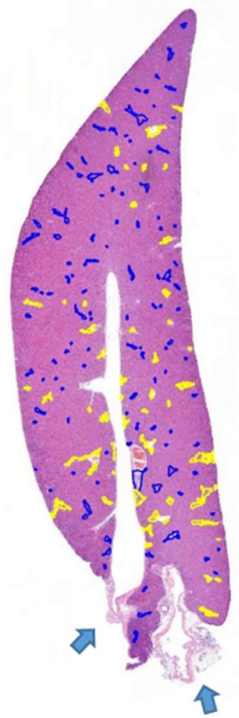

Algorithm prediction

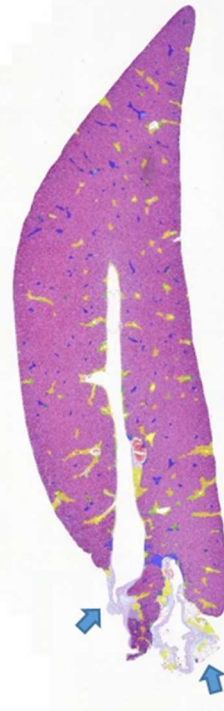

Supplement: s1 [file s1]
